# Supplementary material
Source: PubMed Central journal article supplement (PMC4825153)
Supplement: supp_pp.15.01733_PP2015-01733R1_Supplemental_Figure_S1_S3_Table_S3.pdf [file supp_pp.15.01733_PP2015-01733R1_Supplemental_Figure_S1_S3_Table_S3.pdf]

## Supplementary data

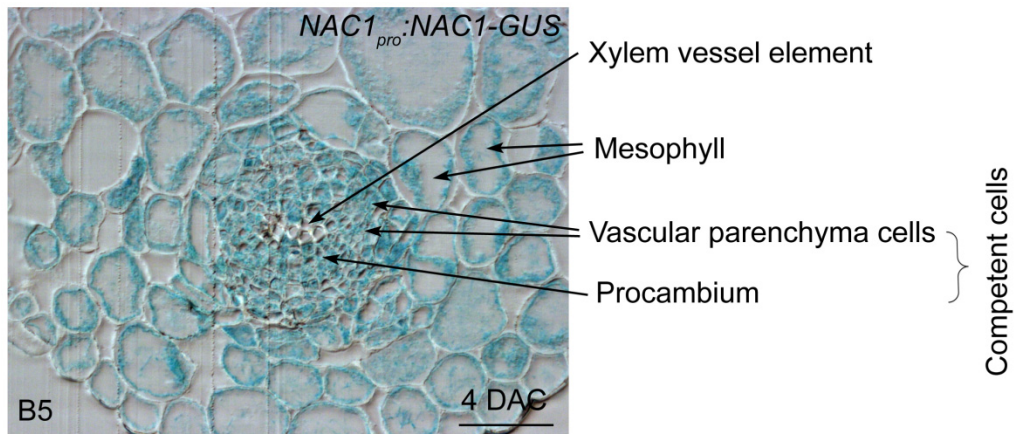

### Supplemental Figure S1. *NAC1* expression in the leaf explant.

Thin sectioning of 4-DAC leaf explants from *NAC1<sub>pro</sub>:NAC1-GUS* cultured on B5 medium at the wounded region, showing the midrib of vasculature.

Scale bars, 50  $\mu\text{m}$ .

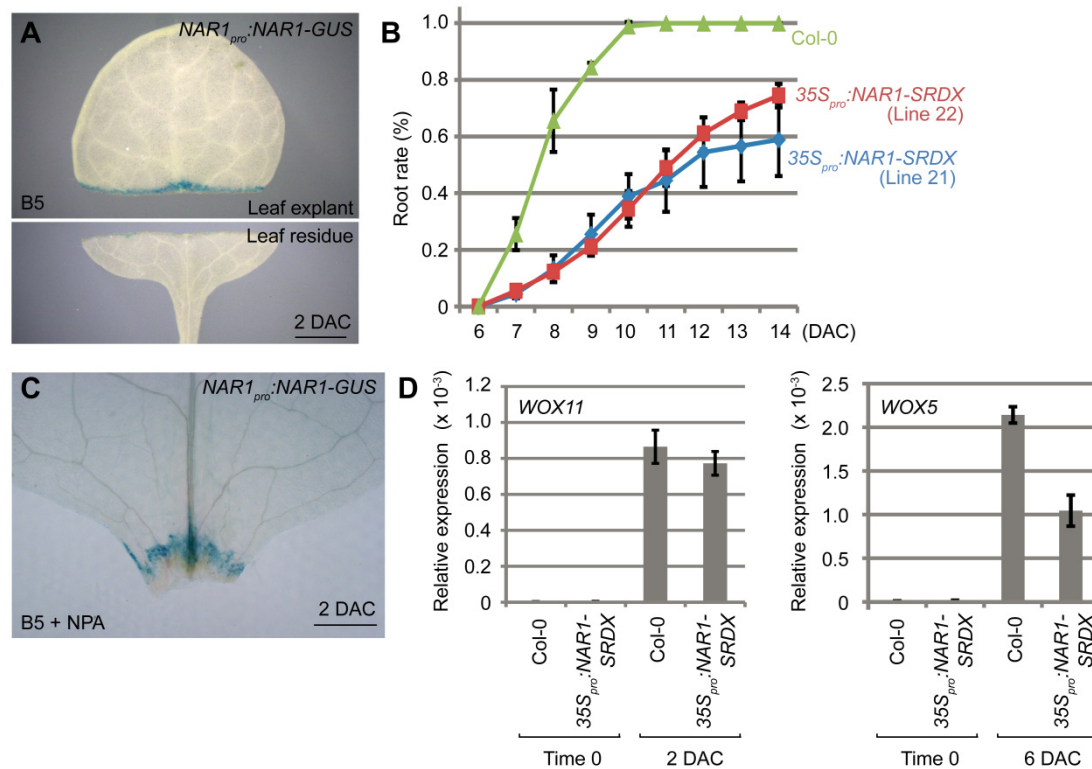

**Supplemental Figure S2. *NAR1* in *de novo* root organogenesis.**

(A) GUS staining in leaf explant (upper panel) and wounded leaf residue (lower panel) of *NAR1<sub>pro</sub>:NAR1-GUS* at 2 DAC.

(B) Rooting rate analyses of leaf explants from Col-0 and *35S<sub>pro</sub>:NAR1-SRDX*. Bars show SD from three biological repeats,  $n = 30$  in each repeat.

(C) GUS staining of *NAR1<sub>pro</sub>:NAR1-GUS* in leaf explant at 2 DAC cultured on B5 medium containing NPA.

(D) qRT-PCR analysis of *WOX11* and *WOX5* transcript levels in leaf explants from Col-0 and *35S<sub>pro</sub>:NAR1-SRDX*. *WOX5* was upregulated in *35S<sub>pro</sub>:NAR1-SRDX* leaf explants at 6 DAC, although the upregulation level is lower than that in the wild-type leaf explants. This might be caused by the arrest of the process from root apical meristem formation to root tip emergence in *35S<sub>pro</sub>:NAR1-SRDX*. Bars show SD from three PCR experiments. Results were confirmed in two biological repeats. Data from one biological repeat are shown.

Scale bars, 1 mm in (A) and 500  $\mu\text{m}$  in (C).

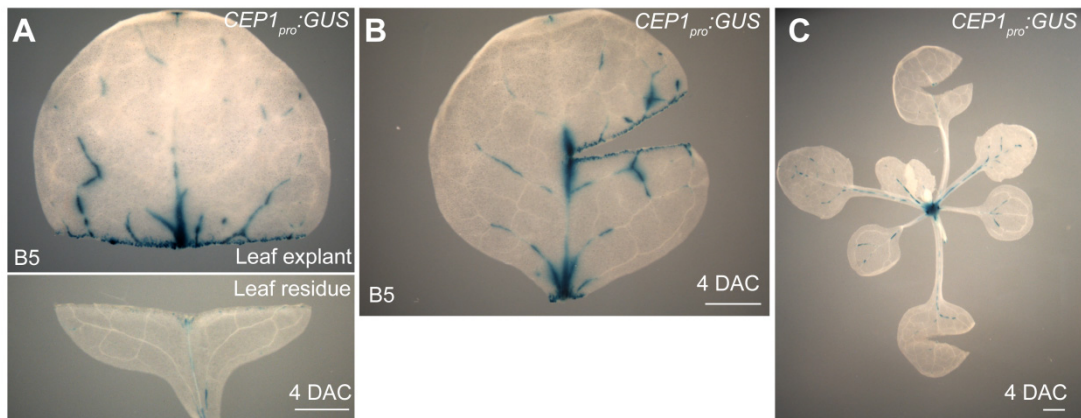

**Supplemental Figure S3. *CEPI* expression responds to wounding of leaf explant.**

(A) GUS staining of *CEPI<sub>pro</sub>::GUS* leaf explant (upper panel) and wounded leaf residue (lower panel) at 4 DAC

(B) Large wound on leaf explant from *CEPI<sub>pro</sub>::GUS* cultured on B5 medium, showing GUS signal in wounded region.

(C) Large wound on seedling of *CEPI<sub>pro</sub>::GUS*, showing no GUS signal in wounded region.

Scale bars, 1 mm in (A-C).

**Supplemental Table S1. RNA-seq analysis of genes expressed in response to wounding.**

**Supplemental Table S2. RNA-seq analysis of genes upregulated in *pER8:3×FLAG-NAC1*.**

**Supplemental Table S3. List of primers used in this study.**

| Experiments                         | Primers                           | Sequence (5' →3')                                                                       |
|-------------------------------------|-----------------------------------|-----------------------------------------------------------------------------------------|
| <b>Molecular cloning</b>            |                                   |                                                                                         |
| <i>NAC1<sub>pro</sub>:NAC1-GUS</i>  | NAC1 <sub>pro</sub> :NAC1-F1      | ccgctcgagGAGTCTGATCATAGGCAC<br>ACG                                                      |
|                                     | NAC1 <sub>pro</sub> :NAC1-R1      | gaagatctGCAATTCCAAACAGTGCTT<br>G                                                        |
| <i>NAR1<sub>pro</sub>:NAR1-GUS</i>  | NAR1 <sub>pro</sub> :NAC1-F1      | acgcgtcgacGGAGAGAAGTGGCAATG<br>AGAG                                                     |
|                                     | NAR1 <sub>pro</sub> :NAC1-R1      | gctctagaGTAATTCCATGCATGGCTTG                                                            |
| <i>CEP1<sub>pro</sub>:GUS</i>       | CEP1 <sub>pro</sub> :GUS-F1       | ccgctcgagTGTTATAATCTGATTAGAC<br>TAA                                                     |
|                                     | CEP1 <sub>pro</sub> :GUS-R1       | tccccgggATTTTCTATGGTGATTTT<br>TGTATTTACTTGTG                                            |
| <i>EXT1<sub>pro</sub>:GUS</i>       | EXT1 <sub>pro</sub> :GUS-F1       | acgcgtcgacGTAGGATTTTGATGGCAG<br>TGTTG                                                   |
|                                     | EXT1 <sub>pro</sub> :GUS-R1       | cgggatccTGTGTTATGTGTTTTGCTTT<br>GTG                                                     |
| <i>NAC1<sub>pro</sub>:NAC1-SRDX</i> | NAC1 <sub>pro</sub> :NAC1-SRDX-F1 | ccgctcgagGAGTCTGATCATAGGCAC<br>ACG                                                      |
|                                     | NAC1 <sub>pro</sub> :NAC1-SRDX-R1 | ccaatgcattggttctgcagTCAAGCGAAACCC<br>AAACGGAGTTCTAGATCCAGATCGAG<br>GCAATTCCAAACAGTGCTTG |
| <i>35S<sub>pro</sub>:NAC1-SRDX</i>  | 35S <sub>pro</sub> :NAC1-SRDX-F1  | gaagatctATGGAGACGGAAGAAGAG                                                              |
|                                     | 35S <sub>pro</sub> :NAC1-SRDX-R1  | acgcgtcgacTCAAGCGAAACCCAAACG<br>GAGTTCTAGATCCAGATCGAGGCAAT<br>TCCAAACAGTGCTTG           |
| <i>35S<sub>pro</sub>:NAR1-SRDX</i>  | 35S <sub>pro</sub> :NAR1-SRDX-F1  | tccccgggATGGAGGAGACAGAAAAG<br>AATAAG                                                    |

|                         |                                  |                                                                                                                 |
|-------------------------|----------------------------------|-----------------------------------------------------------------------------------------------------------------|
|                         | 35S <sub>pro</sub> :NAR1-SRDX-R1 | acgcgtcgacGTAATTCCATGCATGGCTTG                                                                                  |
| <i>pER8:CEP1</i>        | pER8:CEP1-F1                     | ccgctcgagATGAAGCGATTTATTGTCTTGC                                                                                 |
|                         | pER8:CEP1-R1                     | tccgggcccTTAGAGTTCATCCTTAAGCGAGTCC                                                                              |
| <i>pER8:CEP2</i>        | pER8:CEP2-F1                     | ccgctcgagATGAAGAACTTCTTTTGA TATTTC                                                                              |
|                         | pER8:CEP2-R1                     | tccgggcccCTAGAGCTCATCTTTGACATCAC                                                                                |
| <i>pER8:3×Flag-NAC1</i> | pER8:3×Flag-NAC1-F1              | acgcgtcgacATGGACTACAAAGACCATGACGGTGATTATAAAGATCATGATATCGATTACAAGGATGACGATGACAAGggggcccATGGAGACGGAAGAAGAGATGAAGG |
|                         | pER8:3×Flag-NAC1-R1              | gactagtTCAGCAATTCCAAACAGTGC TTG                                                                                 |
| <b>qRT-PCR</b>          |                                  |                                                                                                                 |
| <i>ACTIN</i>            | ACT-F                            | TGGCATCA(T/C)ACTTTCTACAA                                                                                        |
|                         | ACT-R                            | CCACCACT(G/A/T)AGCACAATGTT                                                                                      |
| <i>NAC1</i>             | NAC1-qRT-F1                      | CATCCTCCCAATCATTCTCTG                                                                                           |
|                         | NAC1-qRT-R1                      | GAATGAGTCGAGGCCTGTGA                                                                                            |
| <i>NAR1</i>             | NAR1-qRT-F2                      | ATACGCAACAGGCTACAGAACA                                                                                          |
|                         | NAR1-qRT-R2                      | TGTCGGTCAATTGGCTCTCT                                                                                            |
| <i>WOX11</i>            | WOX11-F3                         | CGCAACCACCAACACTTGTGACC                                                                                         |
|                         | WOX11-R6                         | AAGACATCTGTTGCATCACC                                                                                            |
| <i>WOX5</i>             | WOX5-RT-F                        | GTGAAAGGTCTGAAGCTTACG                                                                                           |
|                         | WOX5-RT-R                        | GTACTGGTTATTGCCTCTAGC                                                                                           |
| <i>CEP1</i>             | CEP1-qRT-F1                      | GACTCACAAGTGAGCTAGTG                                                                                            |
|                         | CEP1-qRT-R1                      | CTACTACCGCAACTCCATGG                                                                                            |

|             |             |                      |
|-------------|-------------|----------------------|
| <i>CEP2</i> | CEP2-qRT-F1 | CGTGCTTGTGACGATAGATG |
|             | CEP2-qRT-R1 | CACACCATGGTTCAGCTCTG |

Note that lower case letters represent additional nucleotides to introduce restriction sites, and the italic letters indicate SRDX or 3×FLAG.
